# Supplementary material
Source: PubMed Central journal article supplement (PMC3945882)
Supplement: cr2013162x1.pdf [file cr2013162x1.pdf]

**A**

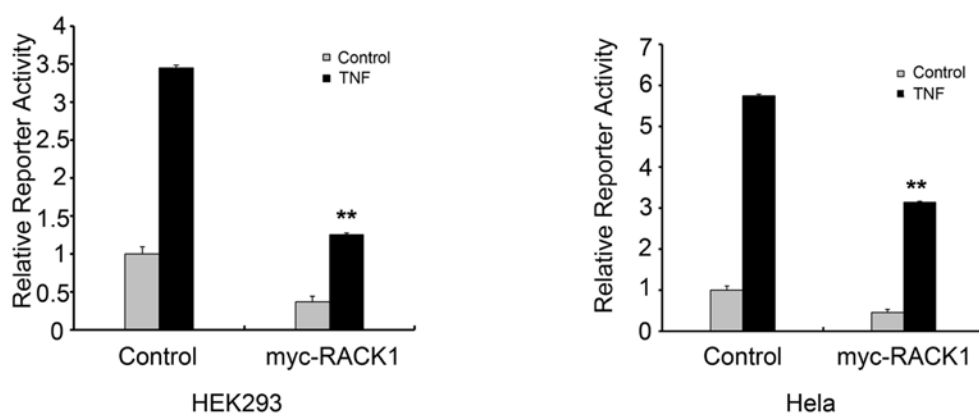

**B**

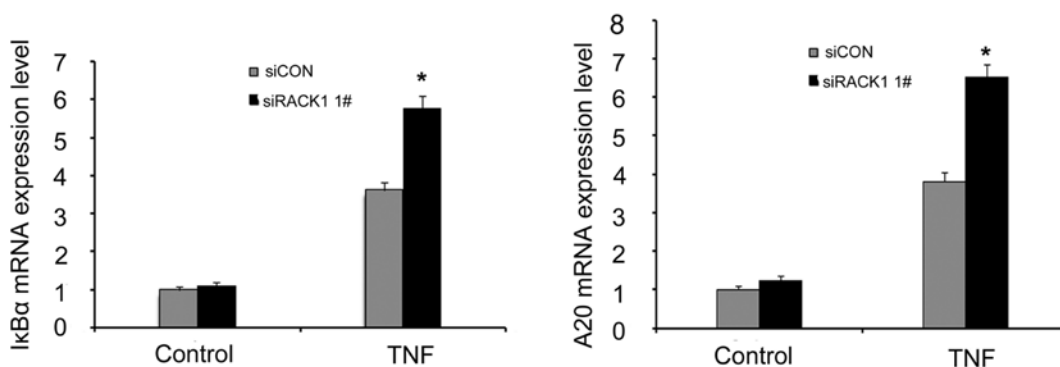

**Figure S1** RACK1 repressed the activity of the NF- $\kappa$ B luciferase reporter and the expression of NF- $\kappa$ B target genes. **(A)** Overexpression of RACK1 inhibited the NF- $\kappa$ B-responsive luciferase reporter in HEK293 and HeLa cells. RACK1 repressed the basal level and TNF-induced activity of the reporter. **(B)** Knockdown of RACK1 enhanced the expression of TNF-induced NF- $\kappa$ B target genes. The indicated 293T cells were treated with TNF or left untreated for 45 min before quantitative RT-PCR was performed. Graphs show the mean  $\pm$  SD,  $n = 3$ . \* $P < 0.05$ ; \*\* $P < 0.01$ .
