# Supplementary material
Source: PubMed Central journal article supplement (PMC3945882)
Supplement: cr2013162x2.pdf [file cr2013162x2.pdf]

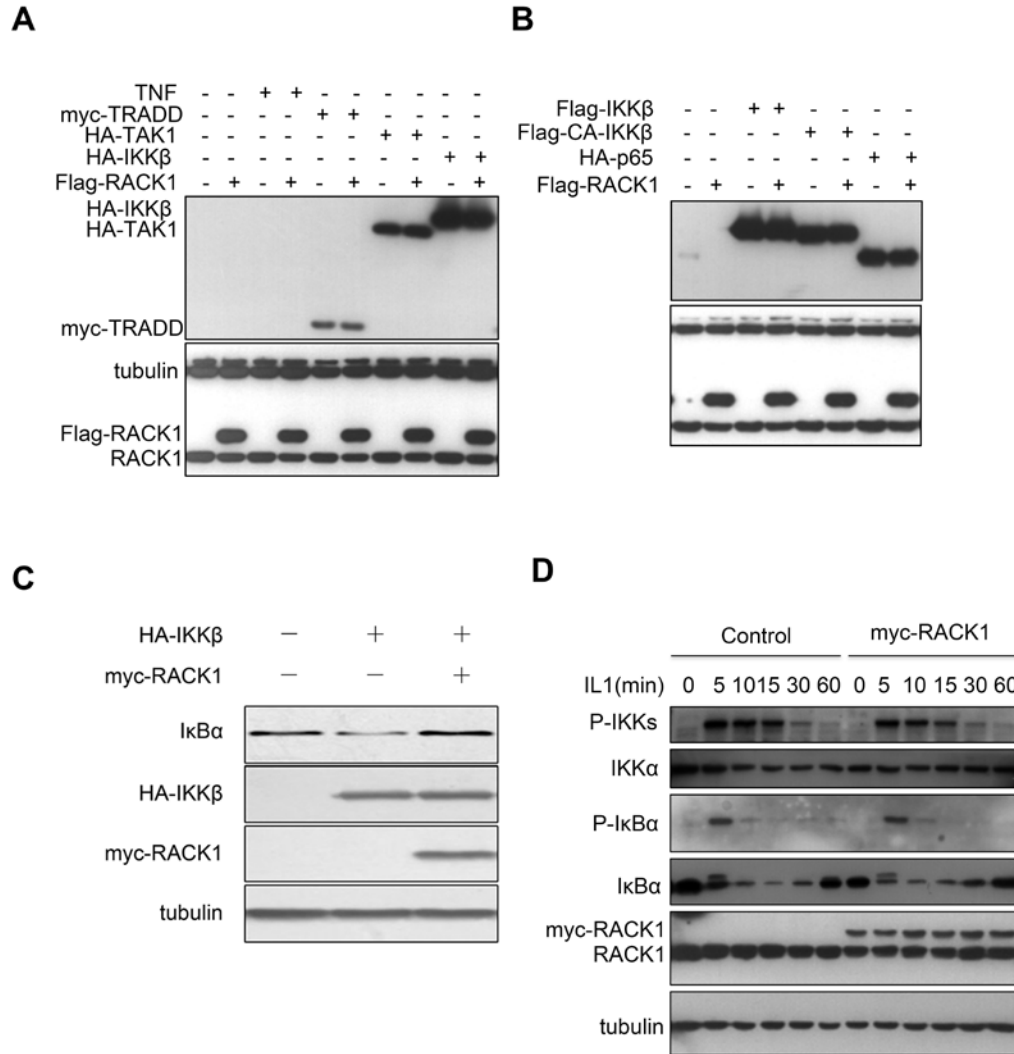

**Figure S2** RACK1 inhibited the TNF signaling pathway by influencing the I $\kappa$ B $\alpha$  degradation induced by IKK $\beta$ . (A) Overexpression of RACK1 inhibited the NF- $\kappa$ B reporter activity induced by components of the TNF pathway. Input controls for Fig. 2A. (B) RACK1 blocked only IKK-dependent NF- $\kappa$ B activation. RACK1 blocked IKK $\beta$ -induced degradation of I $\kappa$ B $\alpha$  but did not affect the NF- $\kappa$ B activity induced by a constitutively active mutant of IKK $\beta$  or p65. CA-IKK $\beta$ , constitutively active IKK $\beta$  mutant. Input controls for Fig. 2B. (C) Overexpression of RACK1 inhibited the IKK $\beta$  induced degradation of I $\kappa$ B $\alpha$  in 293T cells. 293T cells were transfected with the indicated expression plasmids for 24 h; then, the cells were lysed.
