# Supplementary material
Source: PubMed Central journal article supplement (PMC3945882)
Supplement: cr2013162x3.pdf [file cr2013162x3.pdf]

**A**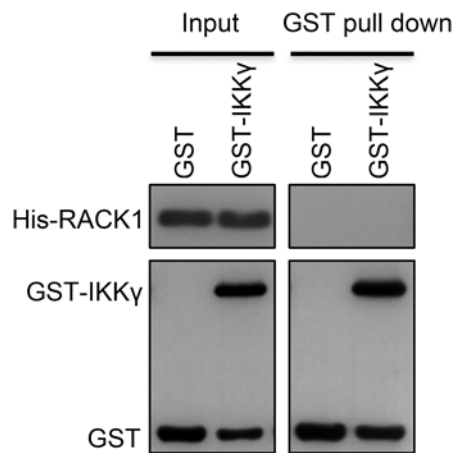**B**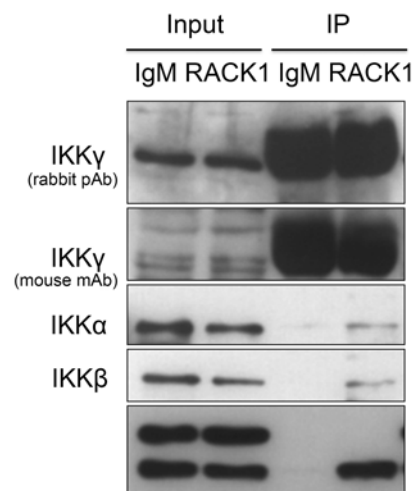

**Figure S3** Binding assays between RACK1 and the IKK complex. **(A)** GST- IKK $\gamma$  did not bind to His-RACK1 via *in vitro* GST pull down assays. His-RACK1 protein (1  $\mu$ g) was incubated with 1  $\mu$ g of GST alone or GST-IKK $\gamma$  fusion protein and then immunoprecipitated with Sepharose beads. **(B)** RACK1 physically interacted with IKK $\alpha$  and IKK $\beta$ . 293T cell extracts were immunoprecipitated with mouse IgM or anti-RACK1 antibody and then subjected to immunoblot analysis of endogenous IKK proteins. Immunoblot analysis with two different anti-IKK $\gamma$  antibodies: mouse anti-IKK $\gamma$  antibody (BD 559675), two bands; and rabbit anti-IKK $\gamma$  antibody (SC-8330). Both of the antibodies could recognize the heavy chain of mouse IgM.
