# Supplementary material
Source: PubMed Central journal article supplement (PMC3945882)
Supplement: cr2013162x4.pdf [file cr2013162x4.pdf]

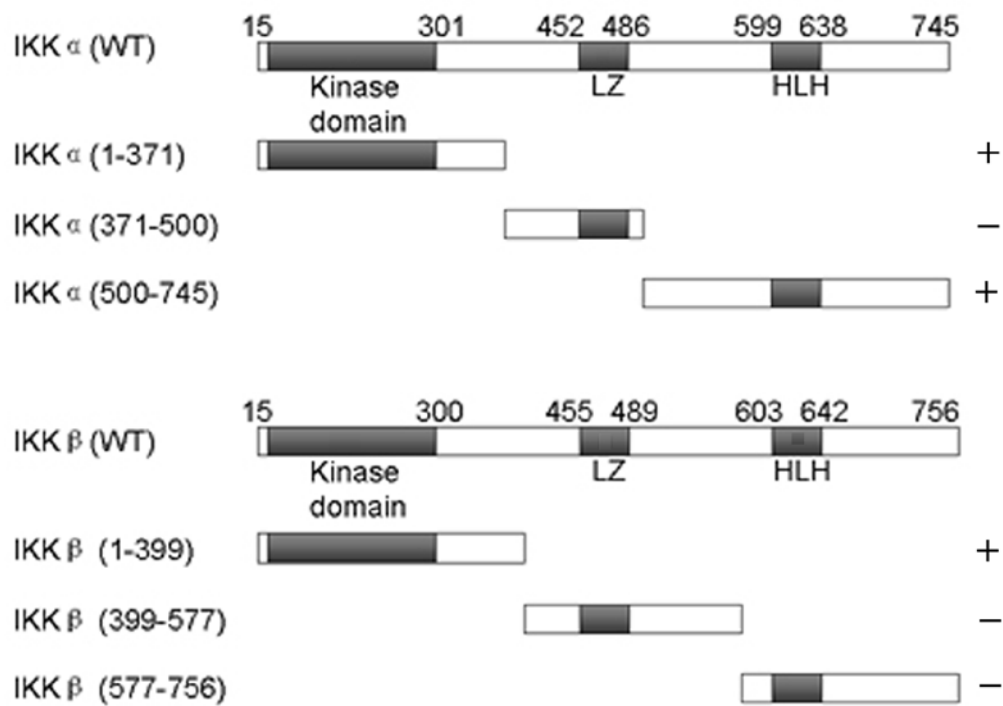

**Figure S4** Truncated mutants of IKK $\alpha$  and IKK $\beta$  that were used in mapping experiments. LZ, leucine zipper; HLH, helix-loop-helix. + RACK1 docking domains in IKKs; - domains not interacting with RACK1 in IKKs.
