# Supplementary material
Source: PubMed Central journal article supplement (PMC3945882)
Supplement: cr2013162x5.pdf [file cr2013162x5.pdf]

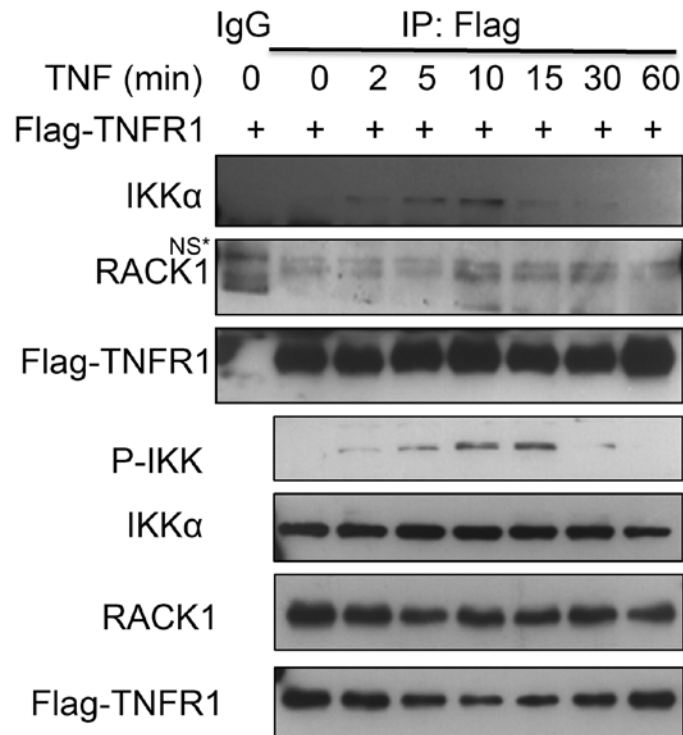

**Figure S5** RACK1 modulated IKK activity through the TNFR1 complex. 293T cells were transfected with the Flag-TNFR1 expression vector, and 18 h later, the cells were treated with TNF (20 ng/ml). The 293T cell extracts were immunoprecipitated with mouse anti-Flag antibody and subjected to immunoblot analysis of endogenous proteins. For Flag-TNFR1, immunoblotting with a rabbit anti-Flag antibody. NS\*, nonspecific band.
