# Supplementary material
Source: PubMed Central journal article supplement (PMC3945882)
Supplement: cr2013162x6.pdf [file cr2013162x6.pdf]

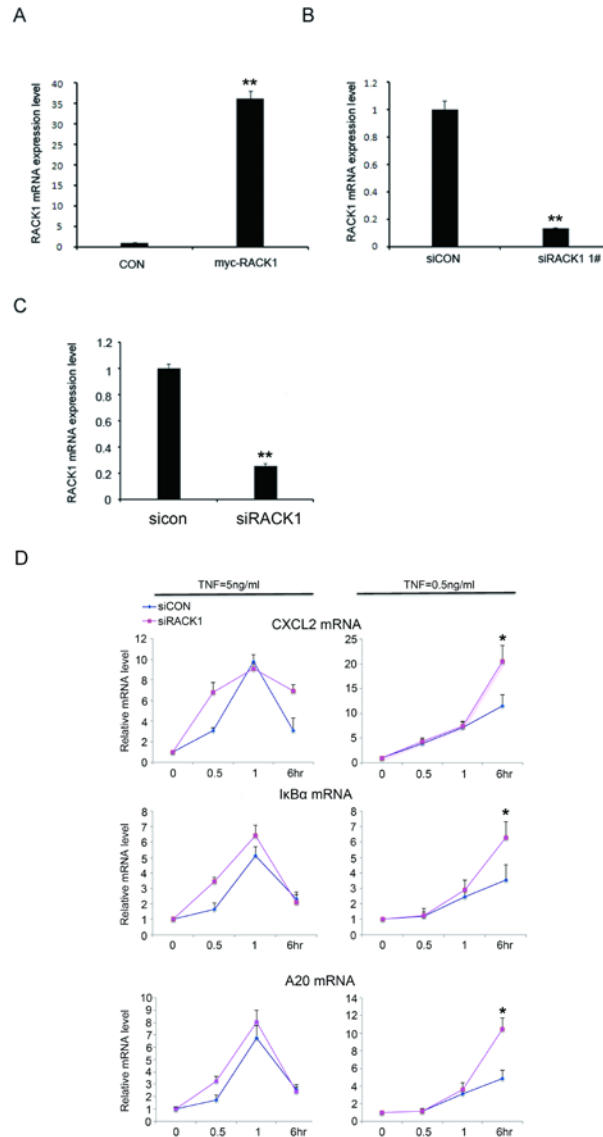

**Figure S6** The expression of RACK1 in 293T and macrophages. **(A)** The RACK1 mRNA expression level in 293T cells transfected with control or myc-RACK1 expression plasmid. **(B)** The RACK1 mRNA expression level in 293T cells infected with control RNAi or RACK1-specific RNAi lentivirus. **(C)** The mRNA expression level of RACK1 in RAW264.7 cells transfected with control or RACK1-specific siRNA. **(D)** The mRNA expression level of NF- $\kappa$ B target genes in RAW264.7 cells transfected with control or RACK1-specific siRNAs. Graphs show the mean  $\pm$  SD,  $n = 3$ . \* $P < 0.05$ ; \*\* $P < 0.01$ .
