# Supplementary material
Source: PubMed Central journal article supplement (PMC3945882)
Supplement: cr2013162x7.pdf [file cr2013162x7.pdf]

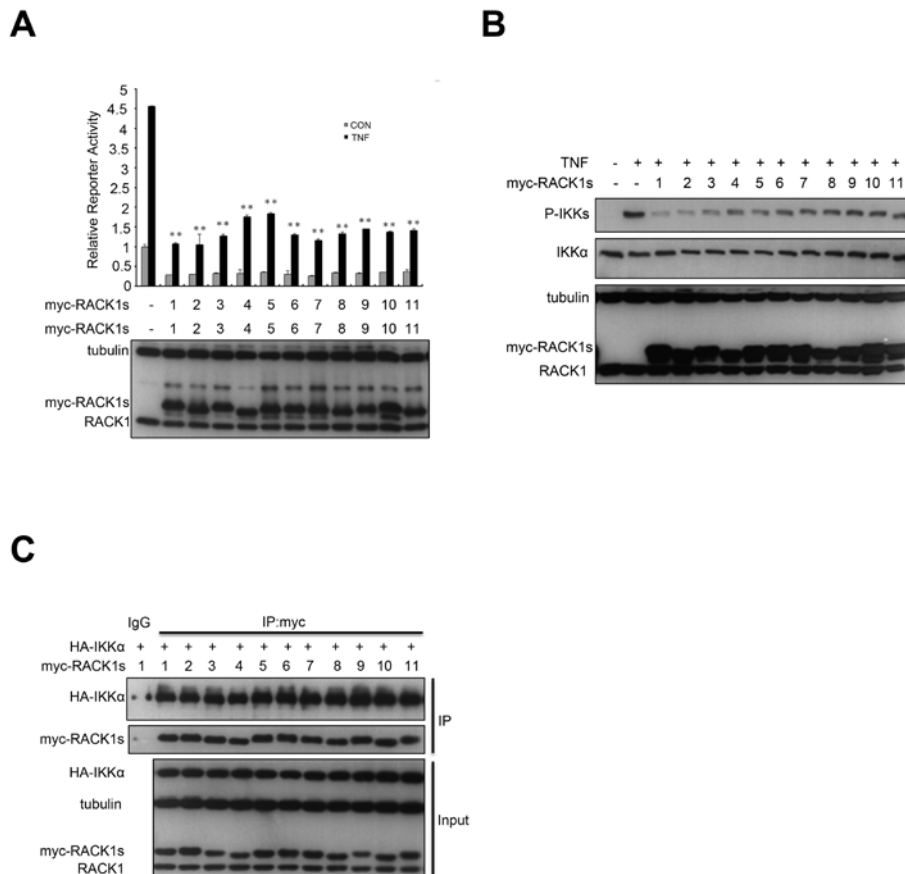

**Figure S7** Various RACK1 mutants inhibited the TNF-induced NF- $\kappa$ B signaling pathway. **(A, B)** 293T cells were transfected with different mutant RACK1 expression plasmids, the NF- $\kappa$ B-responsive luciferase reporter and *Renilla* reporter plasmids or control vector. Twenty-four hours after transfection, the cells were treated with TNF for immunoblotting and luciferase reporter assays. **(C)** 293T cells were transfected with HA-IKK $\alpha$  and the indicated RACK1 mutants, and 24 h later, the cell extracts were immunoprecipitated with mouse anti-myc antibody and then subjected to immunoblot analysis. myc-RACK1 mutants : 1. Wild-type, 2. Y5F, 3. Y52F, 4. Y194F, 5. Y228F, 6. Y246F, 7. Y302F, 8. Y5/52/194/228/246/302F, 9. S46A, 10. S146A, 11. S146/157A and 12. S46/63/80A. Y: tyrosine; F: phenylalanine; S: serine; A: alanine.

Graphs show the mean  $\pm$  SD, n = 3. \* $P$  < 0.05; \*\* $P$  < 0.01
